# Supplementary material for: Deciphering the Molecular Basis of Wine Yeast Fermentation Traits Using a Combined Genetic and Genomic Approach
Source: PubMed Central journal article supplement (PMC3276144; doi:10.1534/g3.111.000422), 2011-09-01
Supplement: supp_1.4.263_FigureS1.pdf [file supp_1.4.263_FigureS1.pdf]

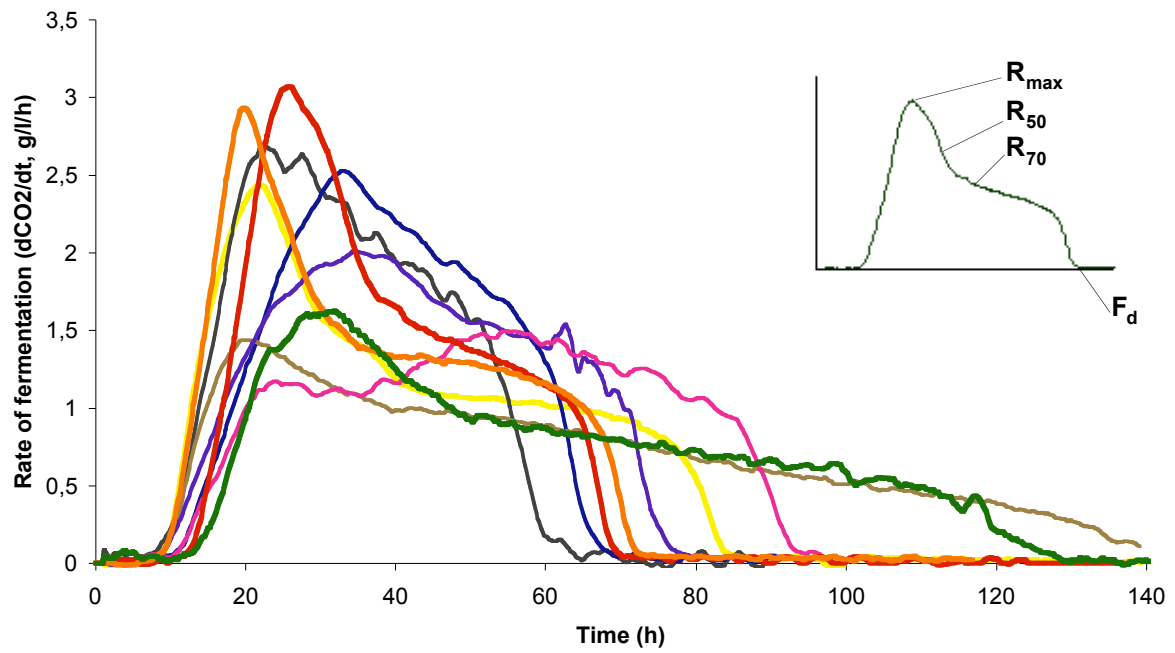

**Figure S1** Fermentation kinetics of EC1118 industrial strain (orange line), S288c laboratory strain (green curve), 59A (red curve), the hybrid Z59S (yellow curve) and some segregants (all other coloured curves). The CO<sub>2</sub> production rate was measured in MS300 medium. (g.L<sup>-1</sup>.h<sup>-1</sup>).
