# Supplementary material for: Deciphering the Molecular Basis of Wine Yeast Fermentation Traits Using a Combined Genetic and Genomic Approach
Source: PubMed Central journal article supplement (PMC3276144; doi:10.1534/g3.111.000422), 2011-09-01
Supplement: supp_1.4.263_FigureS2.pdf [file supp_1.4.263_FigureS2.pdf]

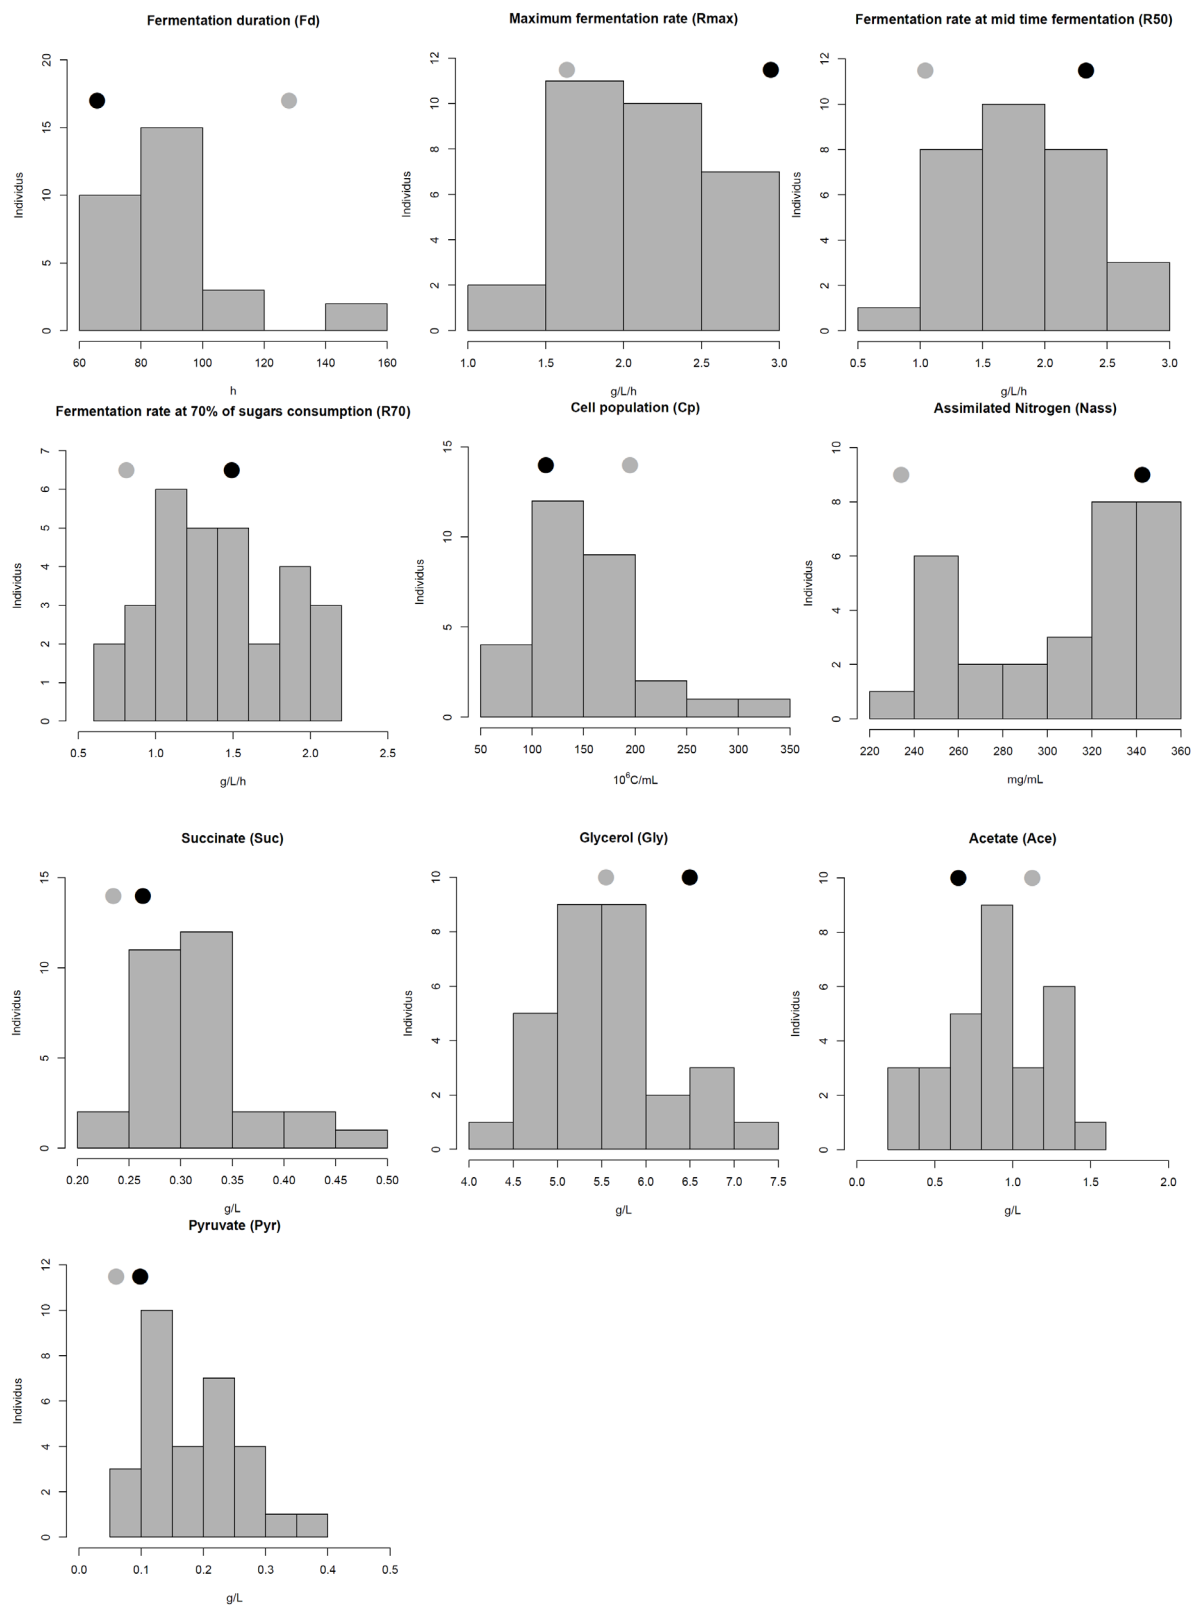

**Figure S2** Distribution of fermentation parameters and metabolites production in the 30 segregants. Parent S288c and 59A mean values are shown on the top as grey (S288c) and black (59A) dots.
