# Supplementary material for: Deciphering the Molecular Basis of Wine Yeast Fermentation Traits Using a Combined Genetic and Genomic Approach
Source: PubMed Central journal article supplement (PMC3276144; doi:10.1534/g3.111.000422), 2011-09-01
Supplement: supp_1.4.263_FigureS4.pdf [file supp_1.4.263_FigureS4.pdf]

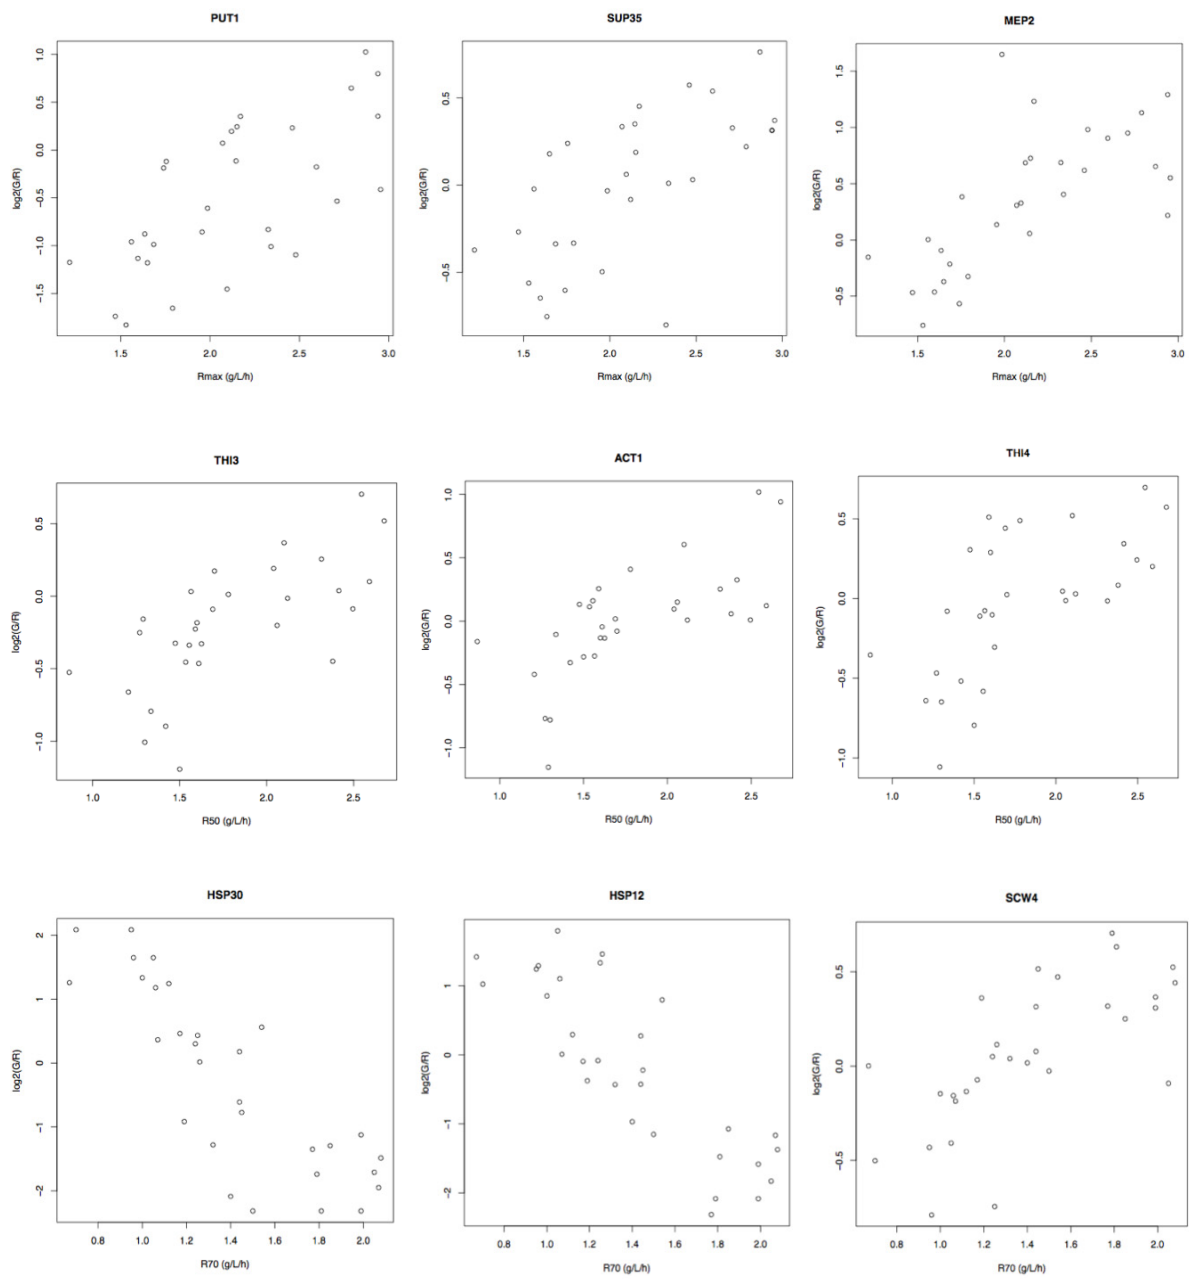

**Figure S4** Correlations between fermentation parameters and the expression ratio of some genes in the population of segregants
