# Supplementary material for: Deciphering the Molecular Basis of Wine Yeast Fermentation Traits Using a Combined Genetic and Genomic Approach
Source: PubMed Central journal article supplement (PMC3276144; doi:10.1534/g3.111.000422), 2011-09-01
Supplement: supp_1.4.263_FigureS7.pdf [file supp_1.4.263_FigureS7.pdf]

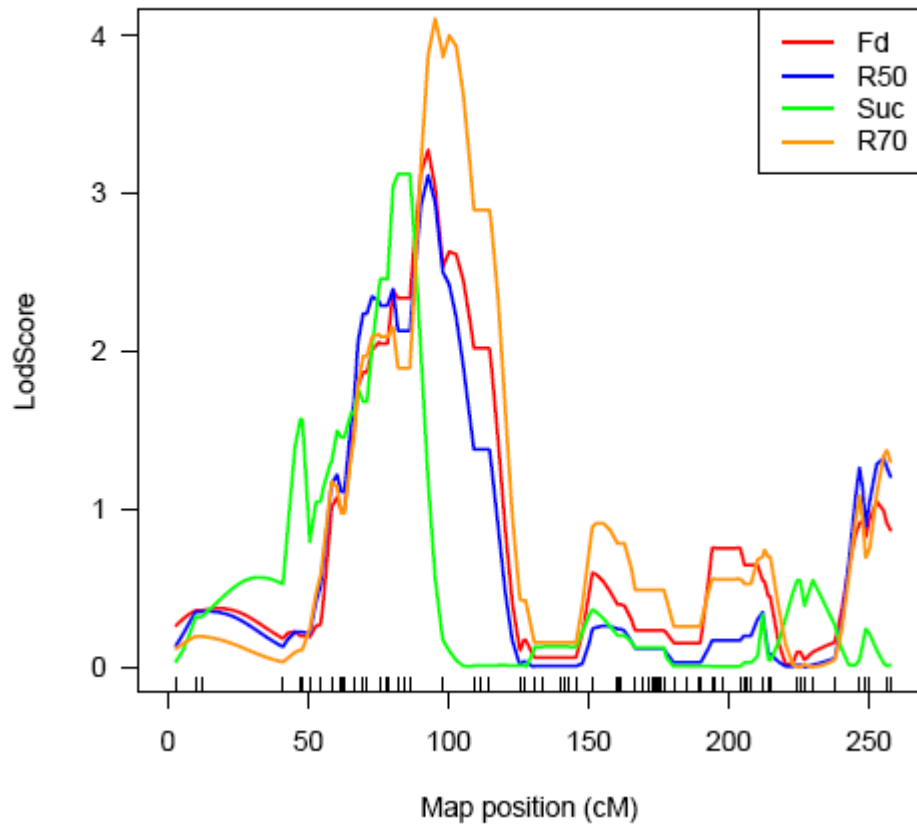

**Figure S7** Overlapping of LOD peak values localised on chromosome II for four phenotypic traits. The x-axis represents the genomic marker localisation and the y-axis represents the LOD score values.
