# Supplementary material for: Deciphering the Molecular Basis of Wine Yeast Fermentation Traits Using a Combined Genetic and Genomic Approach
Source: PubMed Central journal article supplement (PMC3276144; doi:10.1534/g3.111.000422), 2011-09-01
Supplement: supp_1.4.263_FigureS9.pdf [file supp_1.4.263_FigureS9.pdf]

| 59 A                | R      | D     | R     | E     | T   |
|---------------------|--------|-------|-------|-------|-----|
| S. 288C             | EN TGE | KKNIK | EFKDI | SVQEY | YNK |
| RM11-1a             | ENRGE  | KKDIK | EFRDI | SVEEY | YTK |
| VIN13               | ENRGE  | KKDIK | EFRDI | SVEEY | YTK |
| YJM789              | ENRGE  | KKDIK | EFRDI | SVEEY | YTK |
| Y12                 | ENRGE  | KKDIK | EFKDI | SVEEY | YTK |
| UWOPS87.2421        | ENRGE  | KKDIK | EFKDI | SVEEY | YTK |
| UWOPS05.217         | ENRGE  | KKDIK | EFKDI | SVEEY | YTK |
| <i>S. bayanus</i>   | ENRGE  | KKDVE | EFNDI | SVEEY | YTK |
| <i>S. mikatae</i>   | ENRGE  | KKDVR | EFNDI | SVEEY | YTK |
| <i>S. paradoxus</i> | ENRGE  | KEDVR | EFNDI | SVEEY | YTK |
|                     | 313    | 475   | 559   | 650   | 777 |

**Figure S9** Alignment of the Abz1 amino acid modified in the strain 59A with the corresponding region seven other *Saccharomyces cerevisiae* strains and three other *Saccharomyces* species.
