# Supplementary material for: Deciphering the Molecular Basis of Wine Yeast Fermentation Traits Using a Combined Genetic and Genomic Approach
Source: PubMed Central journal article supplement (PMC3276144; doi:10.1534/g3.111.000422), 2011-09-01
Supplement: supp_1.4.263_TableS1.pdf [file supp_1.4.263_TableS1.pdf]

**Table S1 Parental strains and segregants fermentation characteristics**

| Strains | Rmax        | R50         | R70         | Fd         | Cp           | Nass     |
|---------|-------------|-------------|-------------|------------|--------------|----------|
| S288C   | 1.63 (0.03) | 1.04 (0.02) | 0.81 (0.02) | 128 (4.8)  | 194.9 (3.6)  | 234 (7)  |
| 59A     | 2.94 (0.05) | 2.33 (0.17) | 1.49 (0.08) | 66 (0.7)   | 113.2 (3.5)  | 343 (0)  |
| 1b      | 2.96 (0.3)  | 2.54 (0.5)  | 2.07 (NA)   | 65 (4.2)   | 131.8 (8.3)  | 343 (NA) |
| 3a      | 1.65 (0.13) | 1.59 (0.08) | 1.44 (0.12) | 88 (4.9)   | 175 (0)      | 244 (NA) |
| 4c      | 2.87 (0.33) | 2.59 (0.34) | 2.08 (0.22) | 61 (2.5)   | 116.5 (26.9) | 342 (NA) |
| 5a      | 1.96 (0.3)  | 1.69 (0.27) | 1.44 (0.18) | 82 (4.9)   | 162.2 (11)   | 326 (NA) |
| 6b      | 2.59 (0.42) | 2.06 (0.35) | 1.54 (0.13) | 71 (4.6)   | 255 (59.4)   | 342 (NA) |
| 7a      | 2.1 (0.21)  | 1.55 (0.25) | 1.17 (0.15) | 98 (12)    | 172.9 (2.7)  | 294 (NA) |
| 9a      | 1.98 (0.26) | 1.78 (0.1)  | 1.45 (0.03) | 84 (4.9)   | 92.7 (11.7)  | 260 (NA) |
| 10b     | 2.12 (0.93) | 1.53 (0.56) | 1.24 (0.04) | 90 (16.3)  | 246.3 (43.7) | 339 (NA) |
| 14a     | 1.68 (0.04) | 1.6 (0.04)  | 1.4 (0.01)  | 100 (0)    | 102.3 (18.8) | 238 (NA) |
| 14b     | 2.79 (0.42) | 2.67 (0.37) | 2.05 (0.15) | 65 (7.1)   | 242.6 (11.5) | 342 (NA) |
| 16a     | 1.75 (0.15) | 1.34 (0.16) | 1 (0.08)    | 104 (6.4)  | 145.4 (7.3)  | 249 (NA) |
| 16b     | 2.15 (0.13) | 1.42 (0.07) | 1.06 (0.07) | 89 (5.7)   | 135.9 (4)    | 328 (NA) |
| 16c     | 2.94 (0.42) | 2.5 (0.22)  | 1.81 (0)    | 64 (3.9)   | 192.9 (6.2)  | 330 (NA) |
| 16d     | 1.6 (0.21)  | 1.27 (0.26) | 1.25 (0.21) | 94 (10.5)  | 123.3 (9.6)  | 271 (NA) |
| 17a     | 2.17 (0.47) | 2.04 (0.4)  | 1.79 (0.32) | 69 (11)    | 120.8 (6)    | 341 (NA) |
| 18b     | 2.33 (0.21) | 2.12 (0.25) | 1.26 (NA)   | 85 (0.4)   | 193.5 (37.5) | 330 (NA) |
| 18c     | 1.79 (0.17) | 1.3 (0.1)   | 1.12 (0)    | 102 (5.3)  | 124.1 (10.6) | 309 (NA) |
| 19b     | 2.46 (0.23) | 1.62 (0.15) | 1.07 (0.06) | 88 (2.1)   | 154.3 (1.5)  | 335 (NA) |
| 19c     | 1.64 (0.05) | 1.56 (0.04) | 1.32 (0.01) | 96 (1.1)   | 69 (13.8)    | 287 (NA) |
| 20a     | 1.74 (0.06) | 1.7 (0.08)  | 1.5 (0.12)  | 88 (0.7)   | 90.6 (NA)    | 308 (NA) |
| 20b     | 1.56 (0.08) | 1.48 (0.08) | 1.19 (NA)   | 98 (5.7)   | 95.8 (4.5)   | 251 (NA) |
| 22a     | 2.71 (0.54) | 2.42 (0.4)  | 1.99 (0.27) | 63 (2.8)   | 161.1 (29.8) | 342 (NA) |
| 22c     | 1.47 (0.18) | 1.5 (0.41)  | 0.67 (0.09) | 149 (8.5)  | 132.2 (17.3) | 258 (NA) |
| 22d     | 2.94 (0.34) | 2.38 (0.38) | 1.77 (0.17) | 65 (4.2)   | NaN (NA)     | 343 (NA) |
| 23b     | 2.07 (0.25) | 1.29 (0.3)  | 0.96 (0.14) | 100 (5.7)  | 150.2 (12.9) | 326 (NA) |
| 24a     | 2.48 (0.48) | 1.61 (0.69) | 1.05 (0.15) | 90 (9)     | 319.9 (37.6) | 341 (NA) |
| 25a     | 1.53 (0.18) | 1.21 (0.09) | 0.95 (0.18) | 114 (23.3) | 191.6 (NA)   | 241 (NA) |
| 28b     | 2.34 (0.68) | 2.31 (0.69) | 1.99 (0.5)  | 80 (12)    | 148.6 (12.8) | 316 (NA) |
| 29c     | 1.21 (0.08) | 0.86 (0.08) | 0.7 (0.03)  | 144 (6.4)  | 134.4 (8.9)  | 276 (NA) |
| 31b     | 2.15 (0.31) | 2.1 (0.3)   | 1.85 (0.28) | 80 (3.5)   | 108.8 (18)   | 328 (NA) |

Standard deviation for each trait is indicated between parentheses.
