# Supplementary material for: Deciphering the Molecular Basis of Wine Yeast Fermentation Traits Using a Combined Genetic and Genomic Approach
Source: PubMed Central journal article supplement (PMC3276144; doi:10.1534/g3.111.000422), 2011-09-01
Supplement: supp_1.4.263_TableS2.pdf [file supp_1.4.263_TableS2.pdf]

**Table S2 Parental strains and segregants metabolites production characteristics**

| Strains | Suc         | Gly         | Ace         | Pyr         |
|---------|-------------|-------------|-------------|-------------|
| S288C   | 0.23 (0.01) | 5.55 (0.12) | 1.12 (0.04) | 0.06 (0.02) |
| 59A     | 0.26 (0.03) | 6.5 (0.06)  | 0.65 (0.06) | 0.1 (0.01)  |
| 1b      | 0.3 (0.09)  | 5.31 (0.4)  | 0.45 (0.04) | 0.13 (0.02) |
| 3a      | 0.36 (0.07) | 6.49 (0.56) | 1.35 (0.11) | 0.21 (0.05) |
| 4c      | 0.26 (0.01) | 5 (0.24)    | 0.28 (0.08) | 0.21 (0)    |
| 5a      | 0.28 (0)    | 5.61 (0.21) | 1.01 (0.13) | 0.27 (0.05) |
| 6b      | 0.26 (0.07) | 5.56 (0.45) | 0.85 (0.17) | 0.22 (0.06) |
| 7a      | 0.26 (0.02) | 4.88 (0.44) | 1.11 (0.03) | 0.13 (0.02) |
| 9a      | 0.25 (0.02) | 5.19 (0.42) | 0.99 (0.01) | 0.25 (0.09) |
| 10b     | 0.34 (0.1)  | 5.8 (0.3)   | 0.88 (0.2)  | 0.12 (0.07) |
| 14a     | 0.31 (NA)   | 7.01 (NA)   | 1.33 (NA)   | 0.31 (NA)   |
| 14b     | 0.26 (0)    | 4.66 (0.4)  | 0.38 (0.04) | 0.2 (0.01)  |
| 16a     | 0.26 (0.01) | 5.54 (0.31) | 0.97 (0.09) | 0.14 (0.06) |
| 16b     | 0.29 (0.05) | 4.84 (0.26) | 0.81 (0.14) | 0.11 (0.06) |
| 16c     | 0.3 (0.07)  | 5.41 (0.32) | 0.72 (0.14) | 0.12 (0.02) |
| 16d     | 0.42 (0.01) | 6.66 (0.44) | 1.46 (0.21) | 0.18 (0.01) |
| 17a     | 0.31 (0.04) | 6.88 (0.82) | 0.93 (0.02) | 0.25 (0)    |
| 18b     | 0.3 (0.03)  | 5.89 (0.47) | 0.53 (0.1)  | 0.12 (0.02) |
| 18c     | 0.31 (0)    | 5.23 (0.3)  | 1.23 (0.12) | 0.14 (0.02) |
| 19b     | 0.26 (0.06) | 5.13 (0.43) | 0.58 (0.11) | 0.08 (0.01) |
| 19c     | 0.3 (0.03)  | 6.7 (0.38)  | 1.23 (0.14) | 0.26 (0.06) |
| 20a     | 0.34 (0.03) | 5.95 (0.33) | 0.8 (0.15)  | 0.21 (0.01) |
| 20b     | 0.34 (0.06) | 5.78 (0.43) | 1.25 (0.01) | 0.16 (0.08) |
| 22a     | 0.28 (0.08) | 5.49 (0.32) | 0.73 (0.16) | 0.19 (0.05) |
| 22c     | 0.28 (0)    | 4.48 (0.37) | 0.99 (0.07) | 0.09 (0)    |
| 22d     | 0.31 (0.1)  | 5.5 (0.32)  | 0.76 (0.19) | 0.25 (0.05) |
| 23b     | 0.45 (0.01) | 5.81 (0.4)  | 1.03 (0.11) | 0.12 (0.01) |
| 24a     | 0.36 (0.03) | 4.93 (0.26) | 0.61 (0.2)  | 0.07 (0)    |
| 25a     | 0.33 (0.03) | 6.47 (0.76) | 1.25 (0.12) | 0.21 (0.09) |
| 28b     | 0.45 (0.04) | 5.48 (0.23) | 0.33 (0.01) | 0.28 (0.13) |
| 29c     | 0.35 (0.03) | 5.57 (0.44) | 0.95 (0.1)  | 0.13 (0.01) |
| 31b     | 0.24 (0.03) | 5.32 (0.13) | 0.8 (0.04)  | 0.37 (0.07) |

Standard deviation for each trait is indicated between parentheses.
