# Supplementary material for: Deciphering the Molecular Basis of Wine Yeast Fermentation Traits Using a Combined Genetic and Genomic Approach
Source: PubMed Central journal article supplement (PMC3276144; doi:10.1534/g3.111.000422), 2011-09-01
Supplement: supp_1.4.263_TableS3.pdf [file supp_1.4.263_TableS3.pdf]

**Table S3 Genes showing strong differential expression between the two parental strains. (A) Genes overexpressed in 59A. (B) Genes overexpressed in S288c.**

| <b>A</b>  |       |       |          |                                                                                                                              |
|-----------|-------|-------|----------|------------------------------------------------------------------------------------------------------------------------------|
| Name      | logFC | Ratio | Adj PVal | Function                                                                                                                     |
| PAU5      | 3.256 | 9.555 | 8.56E-16 | Part of 23-member seripauperin multigene family encoded mainly in subtelomeric regions                                       |
| PAU4      | 3.242 | 9.458 | 9.26E-15 | Part of 23-member seripauperin multigene family encoded mainly in subtelomeric regions                                       |
| PAU12     | 2.83  | 7.112 | 1.97E-15 | Hypothetical protein                                                                                                         |
| PAU20     | 2.827 | 7.094 | 3.61E-15 | Hypothetical protein                                                                                                         |
| PAU6      | 2.483 | 5.592 | 1.43E-13 | Part of 23-member seripauperin multigene family encoded mainly in subtelomeric regions                                       |
| PAU1      | 2.412 | 5.322 | 1.78E-14 | Part of 23-member seripauperin multigene family encoded mainly in subtelomeric regions                                       |
| PAU13     | 2.324 | 5.007 | 8.02E-13 | Putative protein of unknown function                                                                                         |
| INO1      | 2.287 | 4.88  | 1.05E-12 | Inositol 1-phosphate synthase                                                                                                |
| PAU10     | 2.281 | 4.861 | 7.24E-14 | Hypothetical protein                                                                                                         |
| PAU14     | 2.239 | 4.721 | 7.27E-14 | Hypothetical protein                                                                                                         |
| PAU11     | 2.214 | 4.64  | 7.88E-13 | Putative protein of unknown function                                                                                         |
| PAU8      | 2.133 | 4.385 | 7.85E-12 | Hypothetical protein                                                                                                         |
| PAU7      | 2.038 | 4.107 | 3.78E-14 | Part of 23-member seripauperin multigene family                                                                              |
| PAU18     | 1.973 | 3.926 | 1.96E-12 | Hypothetical protein                                                                                                         |
| HXK1      | 1.877 | 3.674 | 2.70E-10 | Hexokinase isoenzyme 1                                                                                                       |
| PAU19     | 1.85  | 3.606 | 3.87E-13 | Hypothetical protein                                                                                                         |
| HUG1      | 1.752 | 3.368 | 1.51E-11 | Protein involved in the Mec1p-mediated checkpoint pathway that responds to DNA damage or replication arrest                  |
| TRK2      | 1.642 | 3.122 | 2.47E-11 | Component of the Trk1p-Trk2p potassium transport system                                                                      |
| YGR126W   | 1.641 | 3.119 | 3.61E-11 | Putative protein of unknown function                                                                                         |
| YNL324W   | 1.638 | 3.112 | 2.74E-12 | Dubious ORF unlikely to encode a functional protein                                                                          |
| YDR102C   | 1.589 | 3.008 | 4.15E-12 | Dubious open reading frame                                                                                                   |
| YPR126C   | 1.558 | 2.945 | 2.35E-14 | Dubious open reading frame unlikely to encode a functional protein                                                           |
| DAN3      | 1.549 | 2.925 | 5.89E-10 | Cell wall mannoprotein with similarity to Tir1p                                                                              |
| DDR48     | 1.544 | 2.917 | 1.37E-07 | DNA damage-responsive protein                                                                                                |
| DAN2      | 1.513 | 2.855 | 1.23E-12 | Cell wall mannoprotein with similarity to Tir1p                                                                              |
| GPH1      | 1.437 | 2.707 | 1.05E-12 | Non-essential glycogen phosphorylase required for the mobilization of glycogen                                               |
| MFA2      | 1.413 | 2.664 | 4.15E-09 | Mating pheromone a-factor                                                                                                    |
| YDL085C-A | 1.402 | 2.643 | 8.24E-09 | Putative protein of unknown function                                                                                         |
| YPR050C   | 1.373 | 2.59  | 1.28E-12 | Dubious open reading frame unlikely to encode a protein                                                                      |
| YDR355C   | 1.334 | 2.521 | 9.76E-12 | Dubious: Dubious open reading frame unlikely to encode a protein                                                             |
| YIL067C   | 1.326 | 2.507 | 5.74E-12 | Uncharacterized protein of unknown function                                                                                  |
| YCL020W   | 1.302 | 2.466 | 2.57E-09 | Retrotransposon TYA Gag gene co-transcribed with TYB Pol                                                                     |
| SOL2      | 1.301 | 2.464 | 9.67E-11 | Protein with a possible role in tRNA export                                                                                  |
| JSN1      | 1.272 | 2.415 | 9.71E-14 | Member of the Puf family of RNA-binding proteins                                                                             |
| GPM1      | 1.271 | 2.412 | 7.16E-10 | Tetrameric phosphoglycerate mutase                                                                                           |
| MSG5      | 1.256 | 2.389 | 4.09E-10 | Dual-specificity protein phosphatase required for maintenance of a low level of signaling through the cell integrity pathway |
| DBP5      | 1.248 | 2.375 | 3.52E-10 | Cytoplasmic ATP-dependent RNA helicase of the DEAD-box family involved in mRNA export from the nucleus                       |
| YBR099C   | 1.246 | 2.372 | 4.78E-11 | Dubious open reading frame unlikely to encode a protein                                                                      |
| SDS24     | 1.223 | 2.334 | 1.77E-10 | One of two S                                                                                                                 |
| HRT1      | 1.221 | 2.33  | 1.20E-11 | RING finger containing subunit of Skp1-Cullin-F-box ubiquitin protein ligases (SCF)                                          |
| PAU17     | 1.218 | 2.326 | 2.77E-09 | Putative protein of unknown function                                                                                         |
| PEX11     | 1.207 | 2.309 | 8.92E-11 | Peroxisomal membrane protein required for peroxisome proliferation and medium-chain fatty acid oxidation                     |

|           |       |       |          |                                                                    |
|-----------|-------|-------|----------|--------------------------------------------------------------------|
| MSH6      | 1.206 | 2.307 | 4.89E-09 | Protein required for mismatch repair in mitosis and meiosis        |
| FLO5      | 1.205 | 2.306 | 1.71E-13 | Lectin-like cell wall protein (flocculin) involved in flocculation |
| YFL052W   | 1.205 | 2.306 | 1.93E-13 | Putative zinc cluster protein that contains a DNA binding domain   |
| YKR045C   | 1.202 | 2.3   | 2.57E-10 | Putative protein of unknown function                               |
| YJL127W-A | 1.201 | 2.298 | 1.22E-08 | Dubious open reading frame unlikely to encode a protein            |
| DAN1      | 1.2   | 2.297 | 3.92E-10 | Cell wall mannoprotein with similarity to Tir1p                    |
| ENP1      | 1.189 | 2.28  | 2.20E-08 | Protein associated with U3 and U14 snoRNAs                         |
| YHR049C-A | 1.188 | 2.279 | 7.03E-11 | Dubious open reading frame unlikely to encode a functional protein |

## B

| Name       | logFC | Ratio  | Adj PVal | Function                                                                                                             |
|------------|-------|--------|----------|----------------------------------------------------------------------------------------------------------------------|
| PLC1       | 4.693 | 25.864 | 4.07E-19 | Phospholipase C                                                                                                      |
| YNL284C-A* | 4.252 | 19.047 | 1.89E-19 | Retrotransposon TYA Gag gene co-transcribed with TYB Pol                                                             |
| AI2*       | 4.235 | 18.833 | 3.92E-18 | Reverse transcriptase required for splicing of the COX1 pre-mRNA                                                     |
| RTC4       | 3.439 | 10.844 | 3.68E-18 | Putative protein of unknown function                                                                                 |
| CDC5       | 2.857 | 7.246  | 2.82E-17 | Polo-like kinase with similarity to Xenopus Plx1 and S                                                               |
| ARH1       | 2.77  | 6.823  | 1.55E-17 | Oxidoreductase of the mitochondrial inner membrane                                                                   |
| YGR051C    | 2.53  | 5.776  | 2.24E-17 | Dubious open reading frame unlikely to encode a protein                                                              |
| YER084W    | 2.49  | 5.617  | 4.91E-16 | Dubious open reading frame unlikely to encode a protein                                                              |
| YNL285W    | 2.459 | 5.498  | 1.12E-17 | Dubious open reading frame unlikely to encode a functional protein                                                   |
| ELG1       | 2.437 | 5.413  | 1.57E-14 | Protein required for S phase progression and telomere homeostasis                                                    |
| ATE1       | 2.41  | 5.316  | 1.89E-19 | Arginyl-tRNA-protein transferase                                                                                     |
| YER138W-A  | 2.379 | 5.201  | 5.74E-12 | Putative protein of unknown function                                                                                 |
| SCH9       | 2.365 | 5.152  | 3.30E-16 | Protein kinase involved in transcriptional activation of osmostress-responsive genes                                 |
| YBL107W-A  | 2.234 | 4.705  | 6.28E-14 | Dubious open reading frame unlikely to encode a protein                                                              |
| RSA1       | 2.204 | 4.609  | 5.55E-18 | Protein involved in the assembly of 60S ribosomal subunits                                                           |
| THI80      | 2.157 | 4.459  | 1.55E-16 | Thiamine pyrophosphokinase                                                                                           |
| HSP30      | 2.121 | 4.349  | 3.76E-08 | Hydrophobic plasma membrane localized                                                                                |
| YBL111C    | 2.068 | 4.192  | 9.79E-18 | Helicase-like protein encoded within the telomeric Y element                                                         |
| YHR218W    | 2.018 | 4.051  | 2.21E-16 | Helicase-like protein encoded within the telomeric Y element                                                         |
| YIR014W    | 1.93  | 3.809  | 2.68E-15 | Putative protein of unknown function                                                                                 |
| GIN4       | 1.894 | 3.717  | 1.51E-17 | Protein kinase involved in bud growth and assembly of the septin ring                                                |
| HSP12      | 1.885 | 3.695  | 2.94E-14 | Plasma membrane localized protein that protects membranes from desiccation                                           |
| PBP1       | 1.857 | 3.623  | 1.05E-14 | Protein interacting with poly(A)-binding protein Pab1p                                                               |
| YHL005C    | 1.842 | 3.584  | 6.15E-17 | Dubious open reading frame unlikely to encode a protein                                                              |
| AUA1       | 1.801 | 3.485  | 8.96E-09 | Protein required for the negative regulation by ammonia of Gap1p                                                     |
| TPO3       | 1.8   | 3.481  | 9.65E-14 | Polyamine transport protein specific for spermine                                                                    |
| RPL2B      | 1.767 | 3.402  | 2.51E-14 | Protein component of the large (60S) ribosomal subunit                                                               |
| YER053C-A  | 1.745 | 3.352  | 1.89E-06 | Putative protein of unknown function                                                                                 |
| MCM22      | 1.737 | 3.334  | 6.76E-15 | Protein involved in minichromosome maintenance                                                                       |
| ASP3-1     | 1.734 | 3.326  | 9.66E-15 | Cell-wall L-asparaginase II                                                                                          |
| SPS100     | 1.712 | 3.276  | 1.94E-11 | Protein required for spore wall maturation                                                                           |
| ASP3-3     | 1.704 | 3.257  | 4.88E-14 | Cell-wall L-asparaginase II                                                                                          |
| NPY1       | 1.669 | 3.18   | 5.89E-15 | NADH diphosphatase (pyrophosphatase)                                                                                 |
| HST1       | 1.665 | 3.172  | 3.56E-15 | NAD(+)-dependent histone deacetylase                                                                                 |
| YLR281C    | 1.665 | 3.17   | 1.01E-16 | Putative protein of unknown function                                                                                 |
| SPR3       | 1.644 | 3.125  | 3.61E-15 | Sporulation-specific homolog of the yeast CDC3/10/11/12 family of bud neck microfilament genes                       |
| ASP3-2     | 1.628 | 3.09   | 1.70E-15 | Cell-wall L-asparaginase II                                                                                          |
| YNL260C    | 1.614 | 3.06   | 1.72E-15 | Putative protein of unknown function with similarity to a human protein overexpressed in oral cancers                |
| KAR9       | 1.581 | 2.991  | 8.55E-10 | Karyogamy protein required for correct positioning of the mitotic spindle and for orienting cytoplasmic microtubules |
| VIP1       | 1.577 | 2.984  | 8.36E-14 | Inositol hexakisphosphate (IP6) and inositol heptakisphosphate (IP7) kinase                                          |

|         |        |       |           |                                                                         |
|---------|--------|-------|-----------|-------------------------------------------------------------------------|
| DOT1    | 1.572  | 2.973 | 1.32E-13  | Nucleosomal histone H3-Lys79 methylase                                  |
| AI3     | 1.557  | 2.942 | 1.99E-13  | Endonuclease I-ScellI                                                   |
| MRPL13  | 1.54   | 2.909 | 6.20E-13  | Mitochondrial ribosomal protein of the large subunit                    |
| YLR280C | 1.54   | 2.909 | 5.89E-15  | Dubious open reading frame unlikely to encode a functional protein      |
| ASP3-4  | 1.536  | 2.899 | 2.40E-15  | Cell-wall L-asparaginase II                                             |
| ITC1    | 1.519  | 2.865 | 6.51E-14  | Component of the ATP-dependent Isw2p-Itc1p chromatin remodeling complex |
| YIL089W | 1.511  | 2.851 | 6.00E-13  | Putative protein of unknown function                                    |
| RPA49   | 1.498  | 2.824 | 7.21E-06  | RNA polymerase I subunit A49                                            |
| HXT5    | -1.477 | 2.783 | 3.80 E-15 | Hexose transporter                                                      |
| THI72   | -1,477 | 2.783 | 1.71 E-11 | Transporter of thiamine or related compound                             |

For each gene the  $\log_2$  of fold change, the ratio of expression, the adjusted p-value and the function are indicated. These are Ty1 genes, only one member of each was considered since they cross hybridize.
