# Supplementary material for: Deciphering the Molecular Basis of Wine Yeast Fermentation Traits Using a Combined Genetic and Genomic Approach
Source: PubMed Central journal article supplement (PMC3276144; doi:10.1534/g3.111.000422), 2011-09-01
Supplement: supp_1.4.263_TableS4.pdf [file supp_1.4.263_TableS4.pdf]

**Table S4 Genes with eQTL in the 7 hotspots. Hotspot lod > 3.5**

| <b>Hotspot</b>                                                             | <b>Gene</b> |         |         |           |         |
|----------------------------------------------------------------------------|-------------|---------|---------|-----------|---------|
| <b>Chr II</b><br><br><b>87.8 - 125.3 cM</b><br><b>263400 – 3759000 bp</b>  | YAL044W-A   | SSZ1    | YMR031C | PMP3      | MNE1    |
|                                                                            | FLC2        | SPS100  | NRK1    | HSP12     | ISA2    |
|                                                                            | TDP1        | CYR1    | RPL42A  | FMP37     | PMT6    |
|                                                                            | HSP30       | HXT8    | COQ10   | YGR079W   | ECM12   |
|                                                                            | NTH1        | SPC1    | GSH2    | CYS4      | GCN3    |
|                                                                            | YDR053W     | OSM1    | DDR2    | PTM1      | EMP46   |
|                                                                            | TVP23       | GPX1    | MCT1    | YKL165C-A | YMR010W |
| <b>Chr IV</b><br><br><b>161 – 188.2 cM</b><br><b>483000 – 564600 bp</b>    | SFT2        | STR2    | YOR352W | YJL028W   | SWR1    |
|                                                                            | DAD1        | PNP1    | SMA1    | ISY1      | RHO2    |
|                                                                            | YDR249C     | YNL019C | ELP4    | IZH2      | FMP40   |
|                                                                            | YPL264C     |         |         |           |         |
| <b>Chr XI</b><br><br><b>29.2 – 45.5</b><br><b>87600 – 136500 bp</b>        | YAR069C     | TIM21   | YLR104W | YFR016C   | SEC4    |
|                                                                            | MRPL11      | THI4    | SIP3    | FRS1      |         |
|                                                                            | UME6        | POT1    | CSR2    | ORC4      |         |
| <b>Chr XII</b><br><br><b>147.7 – 171.6 cM</b><br><b>443100 – 514800 bp</b> | CWH43       | RPL43B  | CTF18   | SHE10     | YPL034W |
|                                                                            | MCH1        | ASP3-1  | SSO2    | YOR1      | GSM1    |
|                                                                            | YDL086W     | ASP3-2  | NGL2    | IKI1      |         |
|                                                                            | YEL008W     | ASP3-3  | HUB1    | VPS63     |         |
|                                                                            | IOC3        | ASP3-4  | MRPS12  | YUH1      |         |
| <b>Chr XIV</b><br><br><b>211.6 - 244 cM</b><br><b>634800 – 732000 bp</b>   | CDC15       | HAM1    | MTF1    | VOA1      | DDC1    |
|                                                                            | OLA1        | MOG1    | YMR262W | ENP2      | JID1    |
|                                                                            | SAS10       | YKL050C | DIA1    | YGR251W   | YIL055C |
|                                                                            | DHH1        | MTR2    | ATG4    | YRF1-3    | RPS24B  |
|                                                                            | PCF11       | SPA2    | RRP40   | LSM12     | MDE1    |
|                                                                            | PNC1        | YLR012C | YOR021C | YML131W   | YJL225C |
|                                                                            | NSA1        | GAT3    | RPL3    | YMR086W   |         |
|                                                                            | PEX14       | RFX1    | YOR289W | MRS1      |         |
|                                                                            | PIL1        | YLR243W | YPL107W | KAR2      |         |
| <b>Chr XV</b><br><br><b>51.4 - 71.4 cM</b><br><b>154200 – 214200 bp</b>    | PGS1        | CDC12   | CHS5    | SWC4      | YOL047C |
|                                                                            | ESF1        | KRE27   | RSC2    | YGR265W   | YOR050C |
|                                                                            | MUS81       | SNX4    | ATG17   | YHR003C   | GCY1    |
|                                                                            | YDR532C     | EXO70   | OGG1    | YLR257W   | DSS4    |
|                                                                            | AFG1        | NNF1    | ALO1    | MEC3      | FRE1    |
|                                                                            | MST27       | MLP1    | ILV2    | SFH1      | VPS75   |
|                                                                            | HAP2        |         |         |           |         |
| <b>Chr XVI</b><br><br><b>96 – 126 cM</b><br><b>288000 – 378000 bp</b>      | ATG12       | MRP10   | YEL076C | IDP3      |         |
|                                                                            | YCP4        | MCH1    | ROK1    | YEL008W   |         |
|                                                                            | BUD23       | CHL4    | HIS5    | YCR101C   |         |

Genes which have a LOD score higher than 3.5 in the hotspot are displayed.
